# Supplementary material for: Cylindrical micelles of a POSS amphiphilic dendrimer as nano-reactors for polymerization
Source: Royal Society of Chemistry journal article supplement (doi:10.1039/c7nr07565k), 2018-01-01
Supplement: c7nr07565k1.pdf [file c7nr07565k1.pdf]

Supporting Information

***Cylindrical Micelles of a POSS Amphiphilic Dendrimer  
as the Nano-reactors for Polymerization***

*Jing-Ting Weng,<sup>†</sup> Tso-Fan Yeh,<sup>†</sup> Ashok Zachariah Samuel,<sup>‡</sup> Yi-Fan Huang,<sup>†</sup> Jyun-Hao Sie,<sup>†</sup>  
Kuan-Yi Wu,<sup>†</sup> Chi-How Peng,<sup>§</sup> Hiro-o Hamaguchi,<sup>‡</sup> Chien-Lung Wang<sup>\*,†</sup>*

<sup>†</sup>Department of Applied Chemistry and <sup>‡</sup>Department of Applied Chemistry and Institute of Molecular Science, National Chiao Tung University, No. 1001 Ta-Hsueh Road, Hsinchu 30010, Taiwan

<sup>§</sup>Department of Chemistry and Frontier Research Center on Fundamental and Applied Sciences of Matters, National Tsing Hua University, No. 101, Section 2, Kuang-Fu Road, Hsinchu 30013, Taiwan

\*Corresponding author: [kclwang@nctu.edu.tw](mailto:kclwang@nctu.edu.tw)

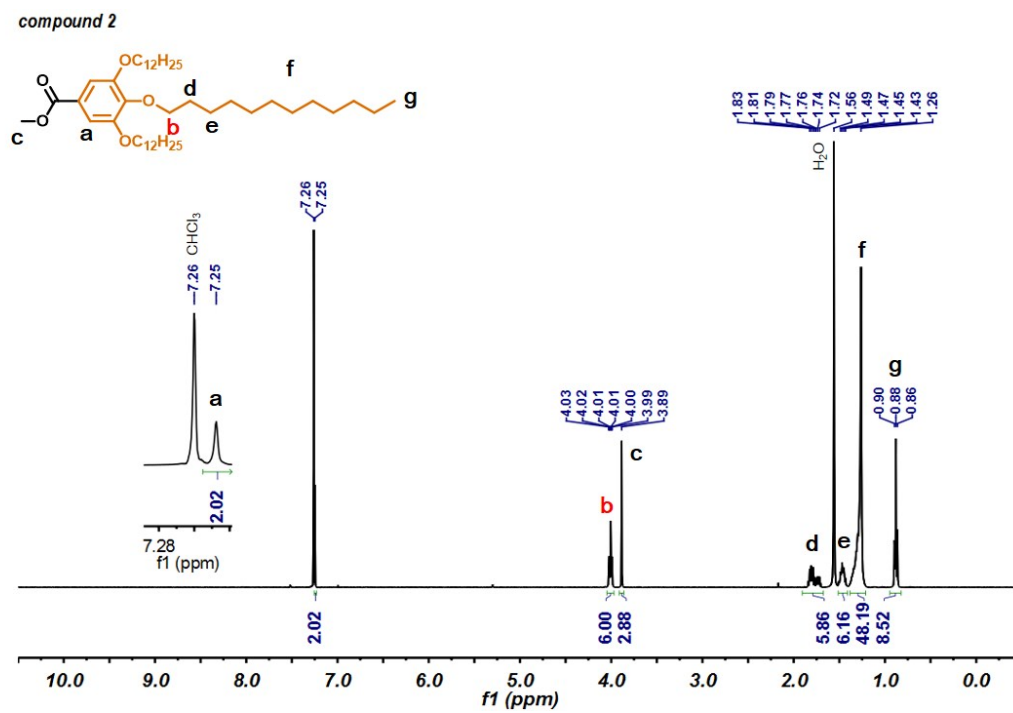

**Figure S1:** <sup>1</sup>H-NMR spectra of **compound (2)** (400 MHz in CDCl<sub>3</sub>)

compound 3

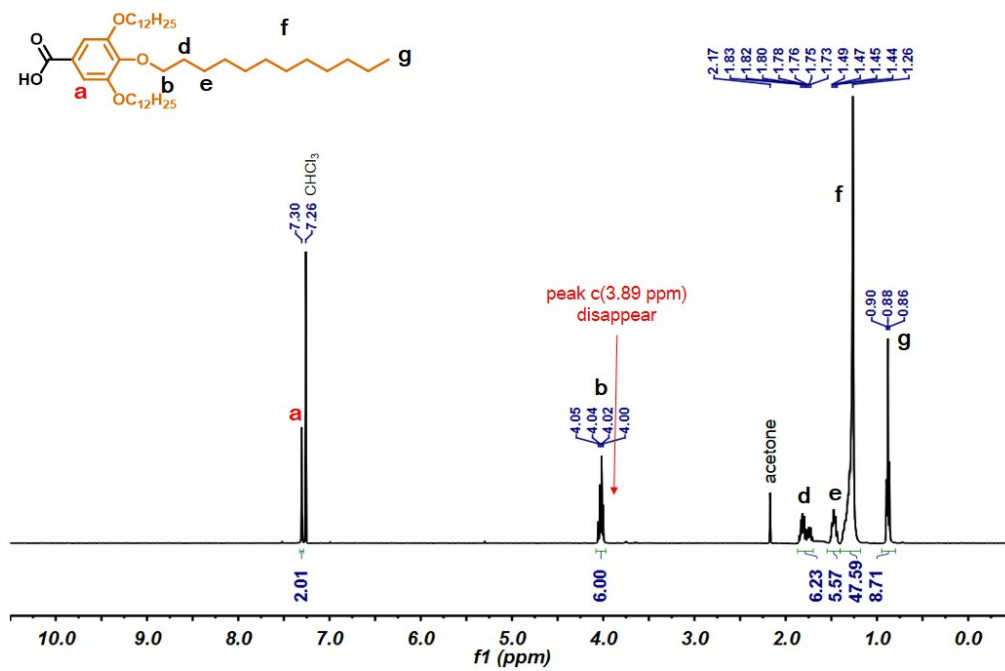

Figure S2:  $^1\text{H}$ -NMR spectra of compound (3) (400 MHz in  $\text{CDCl}_3$ )

compound 4

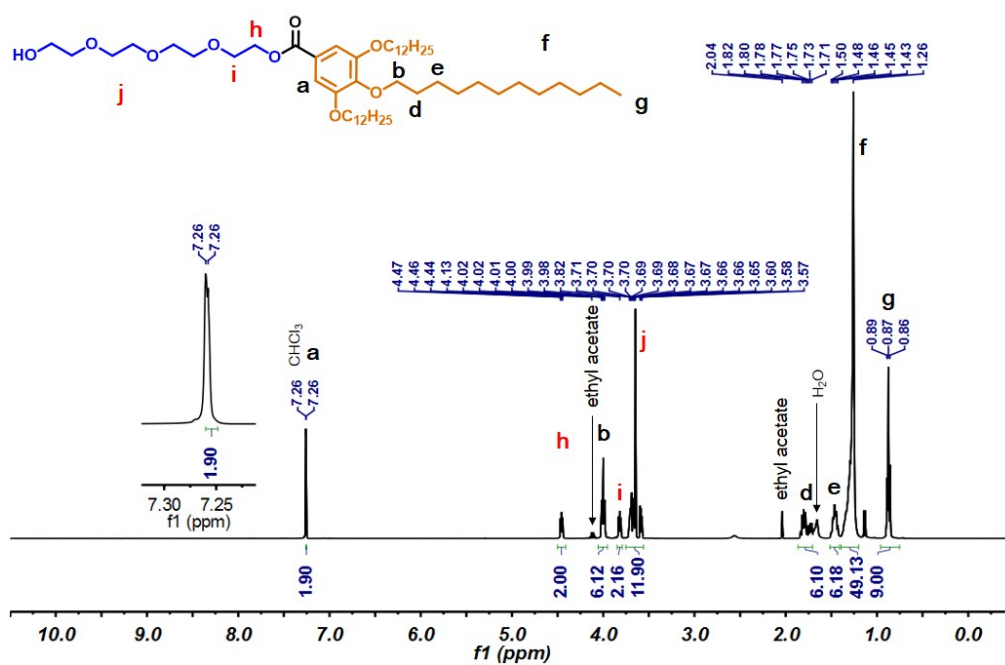

Figure S3:  $^1\text{H}$ -NMR spectra of compound (4) (400 MHz in  $\text{CDCl}_3$ )

compound 5

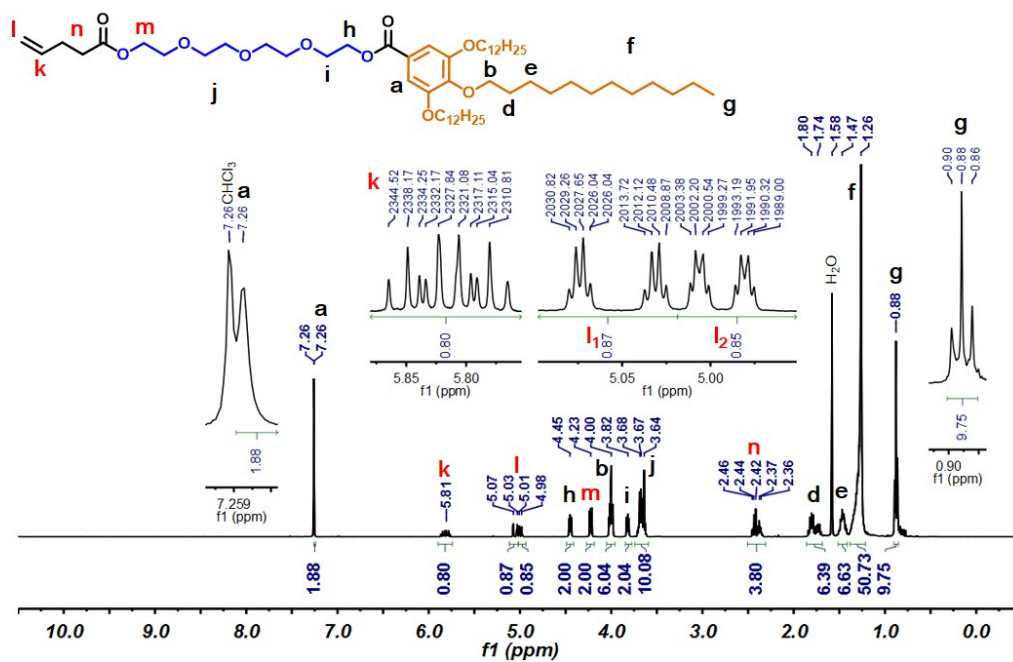

Figure S4: <sup>1</sup>H-NMR spectra of compound (5) (400 MHz in CDCl<sub>3</sub>)



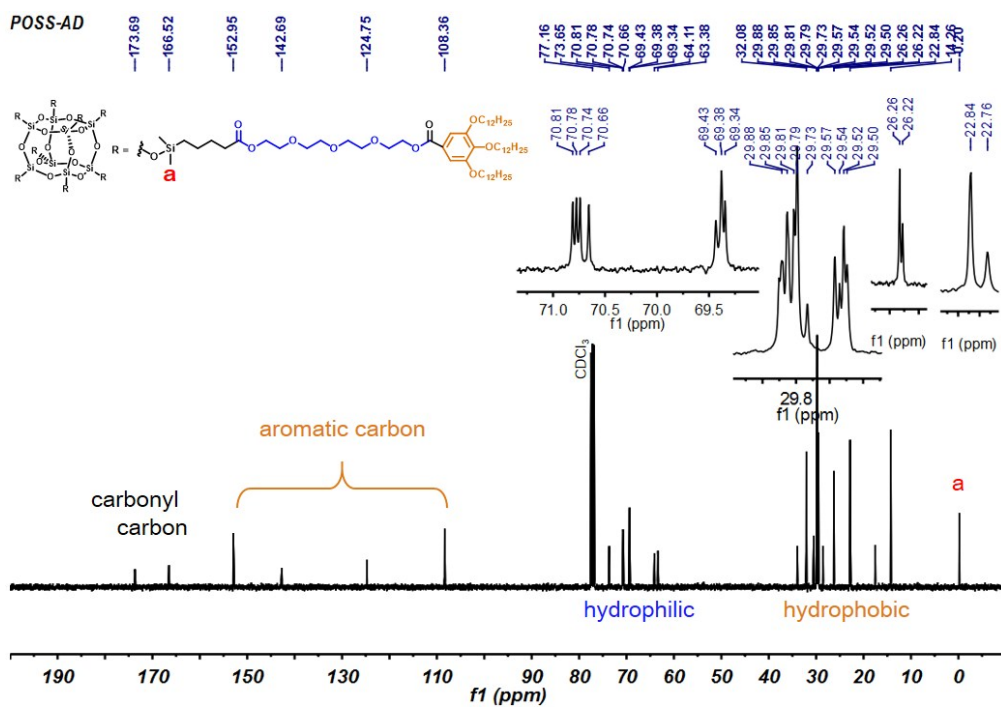

**Figure S6:** <sup>13</sup>C-NMR spectra of **POSS-AD** (101 MHz in CDCl<sub>3</sub>)

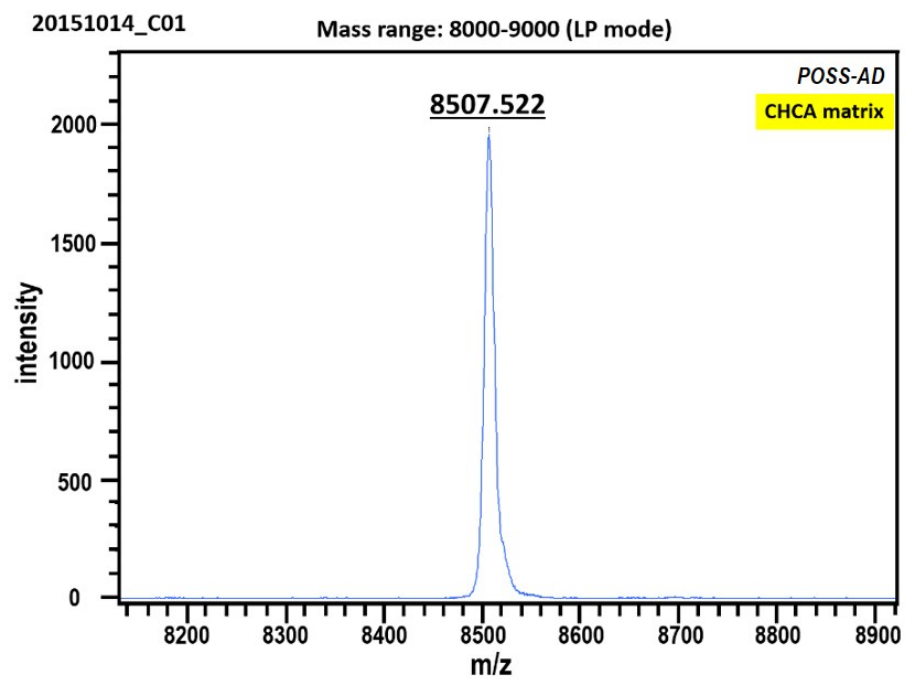

**Figure S7:** MALDI-TOF mass spectra of **POSS-AD**



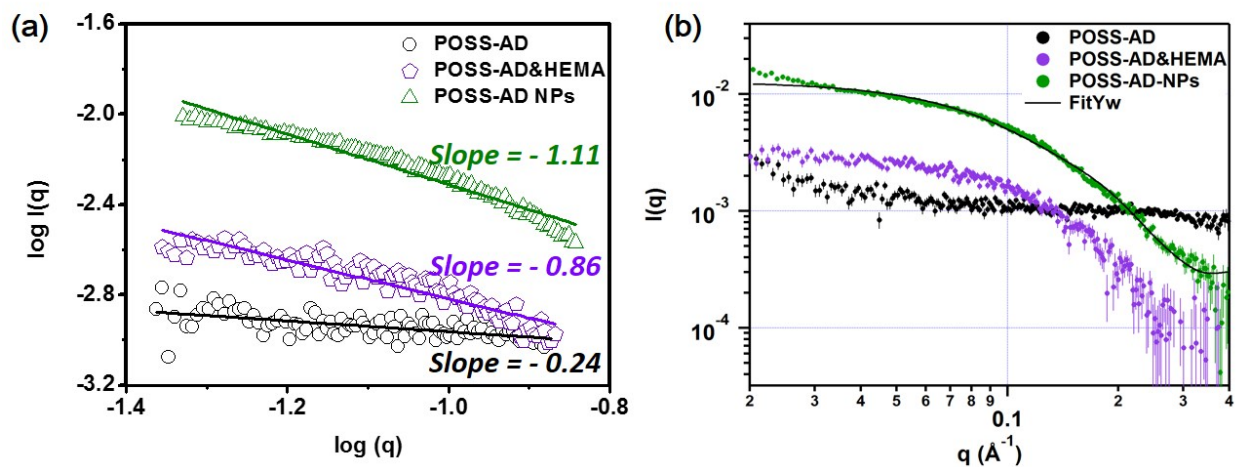

**Figure S8:** (a) power analysis of SAXS scattering curve (b) SAXS scattering curve  $I(q)$  of the hexane solutions for **POSS-AD** (black,  $4.93 \times 10^{-5}$  mol/L), **POSS-AD** and  $2.74 \times 10^{-2}$  mol/L HEMA (purple,  $4.93 \times 10^{-5}$  mol/L), and **POSS-AD NPs** (green,  $4.93 \times 10^{-5}$  mol/L).

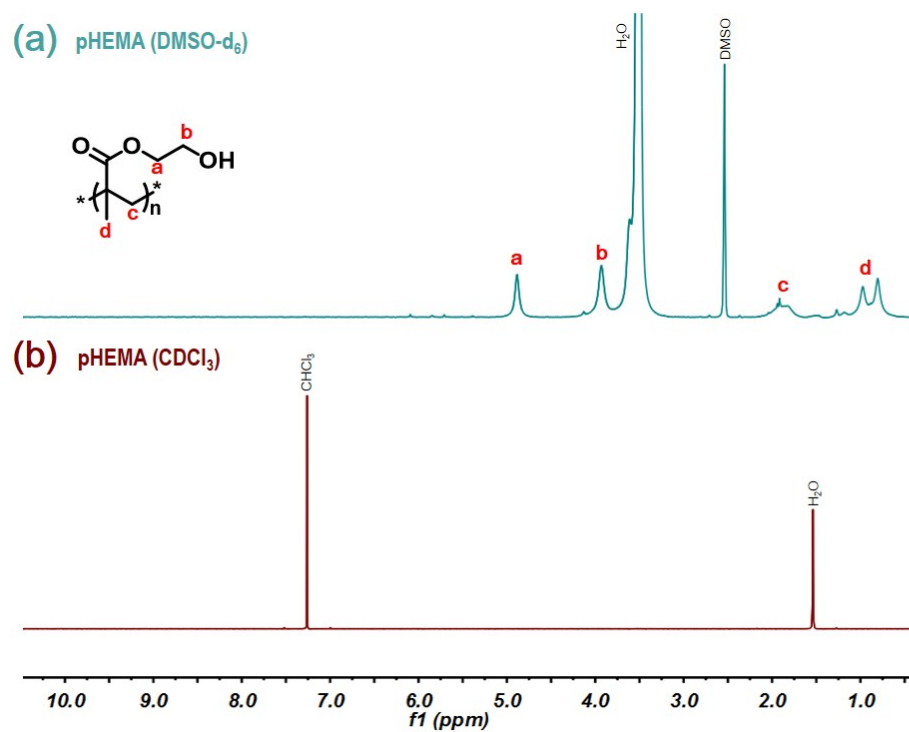

**Figure S9**  $^1\text{H}$  NMR spectra of p(HEMA) in (a) DMSO- $d_6$  and (b)  $\text{CDCl}_3$ . The p(HEMA) was prepared from the precipitation polymerization. (400 MHz in  $\text{CDCl}_3$ )

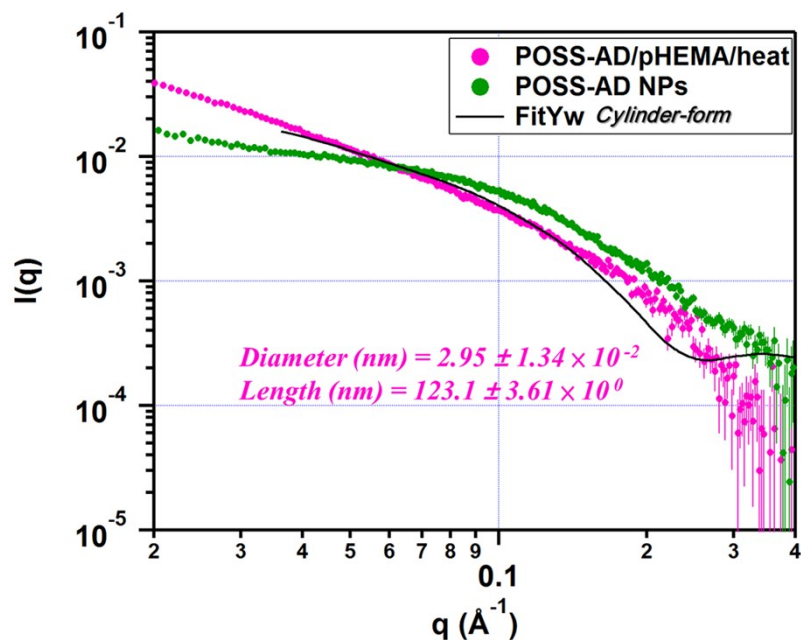

**Figure S10.** SAXS profiles of the hexane solutions of **POSS-AD** and p(HEMA) that were mixed at 90 °C for 45 hr (pink, 0.42 mg/mL), and **POSS-AD NPs** (green, 0.42 mg/mL). The scattering profile of the **POSS-AD**/p(HEMA) mixture cannot be fitted well with a monodispersed cylindrical model, so the fitting results did not match with the dimensions of the **POSS-AD** molecule or the **POSS-AD** micelles.
